# Supplementary material for: Differential Roles of Five Fluffy Genes (flbA–flbE) in the Lifecycle In Vitro and In Vivo of the Insect–Pathogenic Fungus Beauveria bassiana
Source: MDPI journal article supplement (doi:10.3390/jof8040334), 2022-03-23
Supplement: s1 [file s1]

# **Differential roles of five fluffy genes (*flbA–flbE*) in the lifecycle *in vitro* and *in vivo* of the insect-pathogenic fungus *Beauveria bassiana***

**Chong-Tao Guo, Xin-Cheng Luo, Sheng-Hua Ying, and Ming-Guang Feng\***

Institute of Microbiology, College of Life Sciences, Zhejiang University, Hangzhou, Zhejiang, 310058, China

\*Correspondence to Ming-Guang Feng, mgfeng@zju.edu.cn

**Table S1.** Paired primers used for manipulation of *flbA*, *flbB*, *flbC*, *flbD* and *flbE* in *B. bassoama*.

| Primers    | Paired sequences (5'–3')*                                                                                                         | Purpose                                                                   |
|------------|-----------------------------------------------------------------------------------------------------------------------------------|---------------------------------------------------------------------------|
| FlbAc-F/R  | CACAAACACCTTCAAAC <u>CCGGG</u> ATGGCAGCTTTGTTGAACCA / TGCTCACCATGTT<br>AAC <u>GGATCC</u> ATTTTCGATTTCGATCGGCTTT                   | Cloning <i>flbA</i> cDNA (2064 bp) for fusion to <i>GFP</i>               |
| FlbBc-F/R  | CACAAACACCTTCAAAC <u>CCGGG</u> ATGTCTGCCTCGTTGTCTCC / TGCTCACCATGTTA<br>AC <u>GGATCC</u> ATACGCCATTTGCTCCAATC                     | Cloning <i>flbB</i> cDNA (1092 bp) for fusion to <i>GFP</i>               |
| FlbCc-F/R  | CACAAACACCTTCAAAC <u>CCGGG</u> ATGACCATGGCTTTGGATCCT / TGCTCACCATGTT<br>AAC <u>GGATCC</u> ATCCGAGTGGTGCTCTTCG                     | Cloning <i>flbC</i> cDNA (1125 bp) for fusion to <i>GFP</i>               |
| FlbDc-F/R  | CACAAACACCTTCAAAC <u>CCGGG</u> ATGGAAGAAGATGCTACAGCC / TGCTCACCATGT<br>TAAC <u>GGATCC</u> GTCAGTAGAGACGATACGGAA                   | Cloning <i>flbD</i> cDNA (813 bp) for fusion to <i>GFP</i>                |
| FlbAup-F/R | GTACAAGTAACCCGGG <u>GATCC</u> GTGCTGAGGGCATTGAGAA / ACCGAGATTTGACC<br>ATGGGAGCTCGGGACAAGACAAGAAGCGTAA                             | Cloning <i>flbA</i> 5'-end (1503 bp) for targeted gene deletion           |
| FlbAdn-F/R | GTCGACCATGGCTCGAGTCTAGAAAGCCCTGTAGTTTGTGTCC / GGTGGTGGTG<br>GCTAGCGTAACTGTCTCTCTCCGCTCTCC                                         | Cloning <i>flbA</i> 3'-end (1532 bp) for targeted gene deletion           |
| FlbAfl-F/R | <u>GGGACAAGTTTGTACAAAAAGCAGGCT</u> ATCAGCACACAATCCAGTAAT / <u>GGG</u><br><u>GACCACTTTGTACAAGAAAGCTGGGT</u> CGGGTAGTAGGCACCAACAT   | Cloning full-length <i>flbA</i> (5176 bp) for <i>flbA</i> complementation |
| FlbBup-F/R | GTACAAGTAACCCGGG <u>GATCC</u> CGTTCCTGGTGTGTGTC / ACCGAGATTTGACCAT<br>GGGAGCTCAACCAGATACTGCGGCACTAAT                              | Cloning <i>flbB</i> 5'-end (1528 bp) for targeted gene deletion           |
| FlbBdn-F/R | GTCGACCATGGCTCGAGTCTAGAGCTGTGTGAACAAAGCAAAC / GGTGGTGGT<br>GGCTAGCGTAACTGTCTCGCTCTCGGTAC                                          | Cloning <i>flbB</i> 3'-end (1488 bp) for targeted gene deletion           |
| FlbBfl-F/R | <u>GGGACAAGTTTGTACAAAAAGCAGGCT</u> ATGGCGTTGATTGAAAGAGTA / <u>GGG</u><br><u>GACCACTTTGTACAAGAAAGCTGGGT</u> GCGAGATTTCCCGTAGTCG    | Cloning full-length <i>flbB</i> (4115 bp) for <i>flbB</i> complementation |
| FlbCup-F/R | GTACAAGTAACCCGGG <u>GATCC</u> ACTGGCAATCTGTAGACCTCC / ACCGAGATTTGAC<br>CATGGGAGCTCCGCCGCAATGTCATCAAC                              | Cloning <i>flbC</i> 5'-end (1574 bp) for targeted gene deletion           |
| FlbCdn-F/R | GTCGACCATGGCTCGAGTCTAGAGCGCTTATGTTACTGGGG / GGTGGTGGTG<br>CTAGCGTTAAACGCATACCAACAGTCGTCCT                                         | Cloning <i>flbC</i> 3'-end (1472 bp) for targeted gene deletion           |
| FlbCfl-F/R | <u>GGGACAAGTTTGTACAAAAAGCAGGCT</u> TACCCGCTACGAATGAACAC / <u>GGG</u><br><u>GACCACTTTGTACAAGAAAGCTGGGT</u> TATCTCACCCAAAATAAGCC    | Cloning full-length <i>flbC</i> (3765 bp) for <i>flbC</i> complementation |
| FlbDup-F/R | GTACAAGTAACCCGGG <u>GATCC</u> ATTACCGATGTTGCTCAGAAG / ACCGAGATTTGA<br>CCATGGGAGCTCAGATTGGAAGGGCAGGGT                              | Cloning <i>flbD</i> 5'-end (1584 bp) for targeted gene deletion           |
| FlbDdn-F/R | GTCGACCATGGCTCGAGTCTAGATATTGAGAGAGGCTCGGACC / GGTGGTGGTG<br>GCTAGCGTAACTGTTTCCCTTCAGCAG                                           | Cloning <i>flbD</i> 3'-end (1554 bp) for targeted gene deletion           |
| FlbDfl-F/R | <u>GGGACAAGTTTGTACAAAAAGCAGGCT</u> ATACTTTGGCTTCTTCGGTTTC / <u>GGG</u><br><u>GACCACTTTGTACAAGAAAGCTGGGT</u> TGCTTCTCTATCTGCGTGCTA | Cloning full-length <i>flbD</i> (3266 bp) for <i>flbD</i> complementation |
| FlbEup-F/R | GTACAAGTAACCCGGG <u>GATCC</u> ATCCATCCGCTGATTCCGTTTTAT / ACCGAGATTT<br>GACCATGGGAGCTCACGGGCTGAGTTGAAAGGAA                         | Cloning <i>flbE</i> 5'-end (1563 bp) for targeted gene deletion           |
| FlbEdn-F/R | GTCGACCATGGCTCGAGTCTAGAGCGAAGAAAGATGTCAGTGGC / GGTGGTG<br>GTGGCTAGCGTAACTGGGGGTTGTCTGGAGGTC                                       | Cloning <i>flbE</i> 3'-end (1455 bp) for targeted gene deletion           |
| FlbEfl-F/R | <u>GGGACAAGTTTGTACAAAAAGCAGGCT</u> CCGTTCCGAAGAGGGATAA / <u>GGG</u><br><u>GACCACTTTGTACAAGAAAGCTGGGT</u> TCGCGCTCTCACAGCATAG      | Cloning full-length <i>flbE</i> (3824 bp) for <i>flbE</i> complementation |
| pFlbA-F/R  | ACTGGTCTGAACCGTTTTTG / GGGCGTCGTGTCTAAGAACTA                                                                                      | PCR detecting <i>flbA</i>                                                 |
| pFlbB-F/R  | CGCTGCCTACTTGAGACGAC / CGGAATACGGTTTTGTGACTG                                                                                      | PCR detecting <i>flbB</i>                                                 |
| pFlbC-F/R  | ATTACCGCCATTACTACTATCTGAA / AACCAACAATGAAGCCAAAT                                                                                  | PCR detecting <i>flbC</i>                                                 |
| pFlbD-F/R  | AATAGAGGCGTCAGAATAGCAAAG / AAAAAACCTGTTCGCCTTG                                                                                    | PCR detecting <i>flbD</i>                                                 |
| pFlbE-F/R  | ATGTGGAGGTCGTCGGAAAG / ACTCAGAAGAGGAATCAAAAAGACA                                                                                  | PCR detecting <i>flbE</i>                                                 |
| qFlbA-F/R  | CCATCACGAAAACGATCGGC / TCTTTGGCGCGAGACAGAAT                                                                                       | qPCR detecting <i>flbA</i>                                                |
| qFlbB-F/R  | AGATTCCGAGTCAGGGGACA / CTTTCAAAGCGTCCCGCAA                                                                                        | qPCR detecting <i>flbB</i>                                                |
| qFlbC-F/R  | TCTCTAACCCGTGGTCTGTCT / CCAAGGGCATAGAGCCGTAG                                                                                      | qPCR detecting <i>flbC</i>                                                |
| qFlbD-F/R  | TCGAAGTCCAACCTCTCAC / TTGAACCGAGAGTTCCGGTG                                                                                        | qPCR detecting <i>flbD</i>                                                |
| qFlbE-F/R  | AGAATGCCTGGTTCTCGACG / GCTGCTGTTTGTGGTCAAGG                                                                                       | qPCR detecting <i>flbE</i>                                                |
| qActin-F/R | GGCAACATTGTCATGTCTGG / TTTGCTGGAAGGTGGATAGG                                                                                       | qPCR detecting $\beta$ -actin gene                                        |

\* The underlined regions denote the restriction enzyme sites for the fusion of *flbA*, *flbB*, *flbC* or *flbD* cDNA (*Xma*I/*Bam*HI) fusion to *GFP* and the deletion of each *flb* gene (*Bam*HI/*Sac*I and *Xba*I/*Hpa*I). The underlined and italicized regions are the recognition fragments to exchange for the gateway fragment in complementary plasmid.

**Table S2.** Paired primers used in the qPCR analysis of phenotype-related genes in *B. bassiana*.

| Gene                                                                       | Tag loci* | Annotation                           | Sequences (5'-3') of paired primers         |
|----------------------------------------------------------------------------|-----------|--------------------------------------|---------------------------------------------|
| <b>Involved in asexual development</b>                                     |           |                                      |                                             |
| <i>brlA</i>                                                                | BBA_07544 | Key CDP activator BrlA               | CGGCCGTACTACATCCAGG / ACTCCGTTTCCATCGCACTT  |
| <i>abaA</i>                                                                | BBA_00300 | Key CDP activator AbaA               | CCACGGCATGAACCTGTTTG / CGTTCGAGGGCAAAAAGTGG |
| <b>Involved in conidial hydrophobicity and adherence to insect cuticle</b> |           |                                      |                                             |
| <i>hyd1</i>                                                                | BBA_03015 | class I hydrophobin Hyd1             | GTACCTGCACCAAGATCCCC / AAGACCACCGTAAGCGACAG |
| <i>hyd2</i>                                                                | BBA_06599 | Class II hydrophobin Hyd2            | CCAGCGTTCTCAGCGATCTTCTGCTGCTTGCACTTGTTGT    |
| <i>hyd3</i>                                                                | BBA_00530 | Hydrophobin-like protein Hyd3        | CGGCGACGACTTTAAGGGAA / CTAGGAGAATTGCCCGCTGT |
| <i>hyd4</i>                                                                | BBA_03071 | Hydrophobin-like protein Hyd4        | TACTGAGCTTGCTCCCCGTA / AGCAACACCGAGGATGTCAG |
| <i>hyd5</i>                                                                | BBA_02999 | Hydrophobin-like protein Hyd5        | TGCTATCGTGCTCTCTCG / AGGTTGGAGTAGAGACCGCT   |
| <b>Involved in cuticle degradation and host infection</b>                  |           |                                      |                                             |
| <i>pr1A1</i>                                                               | BBA_04506 | Subtilisin-like protease Pr1A1       | TTCCGTACCTCGGACCTGAT / CGAGAAGTATCTCGGTCCC  |
| <i>pr1A2</i>                                                               | BBA_08580 | Subtilisin-like protease Pr1A2       | CGGCGAGACCAAGGACATTA / CTTCGAGTAGACGGTGTCG  |
| <i>pr1B1</i>                                                               | BBA_03653 | Subtilisin-like protease Pr1B1       | TTGCGTACTGCAAGCGAAAG / AACTCTGCTTTGTCCAGCGA |
| <i>pr1B2</i>                                                               | BBA_00443 | Subtilisin-like protease Pr1B2       | CTACCTTTGGCTCTCGGCA / ATGCCAGGTAGTTGACGGTG  |
| <i>pr1B3</i>                                                               | BBA_04617 | Subtilisin-like protease Pr1B3       | CTCCTCACATTGCCGGTCTT / AAGCAGACCAGTGCTGACTC |
| <i>pr1C</i>                                                                | BBA_09153 | Subtilisin-like serine protease Pr1C | ATATCTGGCCCGTCAAGCTG / GTCGCGGGAGTCGATAATGT |
| <i>pr1F1</i>                                                               | BBA_10157 | Subtilisin-like protease Pr1F1       | CTCATCGGGAGAAACCCAGG / TCTCAGCACGACCCTCAAAC |
| <i>pr1F2</i>                                                               | BBA_07320 | Subtilisin-like protease P11F2       | CTACTACGCTTCTGGGGCTG / GGCATACTGGGCTTTTCGC  |
| <i>pr1F3</i>                                                               | BBA_09501 | Subtilisin-like protease Pr1F3       | ACTTGGGCGAGAGCTAACAC / AGGTCTTGAGGCAATCGTG  |
| <i>pr1F4</i>                                                               | BBA_07143 | Subtilisin-like protease Pr1F4       | CGGCGGATTATTCGTACCCA/TGGCCACTCCGTAGGTTTTTC  |
| <i>pr1G</i>                                                                | BBA_09270 | Subtilisin-like protease Pr1G        | TAGGCGGCTCCTTTTCACAG / TGGGACCCCTTTTCTCGTCG |
| <b>Involved in heat shock</b>                                              |           |                                      |                                             |
| <i>hsp20</i>                                                               | BBA_07886 | Heat shock protein Hsp20             | TCGACCTCTTTAACACGCCC / GAGTGCAGCGACTGCAAAAA |
| <i>hsp30a</i>                                                              | BBA_08688 | Heat shock protein Hsp30a            | CGAATTCCCGGAACCACAGA / TGATGTTGGCTTGTCGGAA  |
| <i>hsp30b</i>                                                              | BBA_02057 | Heat shock protein Hsp30b            | ATGACGTGAGCGTCGAGTTT / GTCCTCATCAGACCGGTGG  |
| <i>hsp40a</i>                                                              | BBA_06930 | Heat shock protein Hsp40a, DnaJ      | CAGCCAAGTCATCCAGGGTT / TCTCGGAAGCGGATGCATTT |
| <i>hsp40b</i>                                                              | BBA_08440 | Heat shock protein Hsp40b, DnaJ      | ACATGTCGAGACAGTGGCTG / TGCTTCTGCGCCAAGTTTC  |
| <i>hsp40c</i>                                                              | BBA_03736 | Heat shock protein Hsp40c, DnaJ      | GACCAGTTCCCCGACCAAT / GCCTCGTGAGGGAAATCTT   |
| <i>hsp60</i>                                                               | BBA_05467 | Heat shock protein Hsp60             | GCATTACTCCCAATGGGCT / TGTCTGCATGTCACGCTCTT  |
| <i>hsp70a</i>                                                              | BBA_00941 | Heat shock protein Hsp70a            | AGAATGCGTCCCTGGTGAAG / TGGTGACAAAGATGCCTCC  |
| <i>hsp70b</i>                                                              | BBA_05586 | Heat shock protein Hsp70b            | AGGAGCCCAACAAGAGCATC / ATGGTGGTGTGCGAGGAAT  |
| <i>hsp90</i>                                                               | BBA_06516 | Heat shock protein Hsp90             | GGTGCCGATGCTCCATGAT / TCGTCATCGTTGTGCTTGA   |
| <i>hsp104</i>                                                              | BBA_02283 | Heat shock protein Hsp104            | AGAGTTTCTACGCGTCTCG / ATGCGGTTGAGGAAGTCTGG  |
| <b>Involved in response to oxidative stress</b>                            |           |                                      |                                             |
| <i>sod1</i>                                                                | BBA_02311 | Cytocolic Cu/Zn-SOD Sod1             | ACATTAAGACGGACGCCCAG / TGCCAGTCTTGAGGGACTCT |
| <i>sod2</i>                                                                | BBA_09706 | Cytosolic Mn-SOD Sod2                | CCCTACGCCTACGATGCTTT / AGAGCGAGTGGTTGATGTGG |
| <i>sod3</i>                                                                | BBA_09382 | Mitochondrial Mn-SOD Sod3            | GCCAAACCAAGATCCATTGC / ATTCAGCCTTGCGGTTCTCA |
| <i>sod4</i>                                                                | BBA_04317 | Mitochondrial Fe-SOD Sod4            | AGCTTCCTTTTCTCCGTCG / ACGGTGTTTCATGTCGGTTGA |
| <i>sod5</i>                                                                | BBA_01984 | Cell wall-anchored Cu/Zn-SOD Sod5    | TCACCACCCTTTCACTTCG / TCAACCTTCTGGAAGTCGGC  |
| <i>cat1</i>                                                                | BBA_06186 | Spore-specific catalase CatA         | TTGCGTTTTGCACTAGCCAC / AGCTCTTCCAGTTGATGCC  |
| <i>Cat2</i>                                                                | BBA_05603 | Secreted catalase CatB               | GAGTCGGTCGATGCTACCAG / CCGCCTTTAGGCTTTCTGA  |
| <i>Cat3</i>                                                                | BBA_09109 | Cytoplasmic catalase CatC            | GCTACGGAAACACGAATGGC / CAGACACATGCTCCAGCACT |
| <i>Cat4</i>                                                                | BBA_09760 | Secreted catalase CatD               | CTTTTTGTGTACGCCGGCAA / ATGCTGTGCTGGCGTTGTA  |
| <i>Cat5</i>                                                                | BBA_09338 | Peroxisomal catalase CatP            | AGATTGCCGTCTCCACAAG / GTCGGGGTCTTTTCTACCCG  |
| <i>cat6</i>                                                                | BBA_06567 | Catalase-like domain, heme-dependent | TGGAAAGAGACGATTGCGCT / TTTACCGGGCAACGATTCA  |

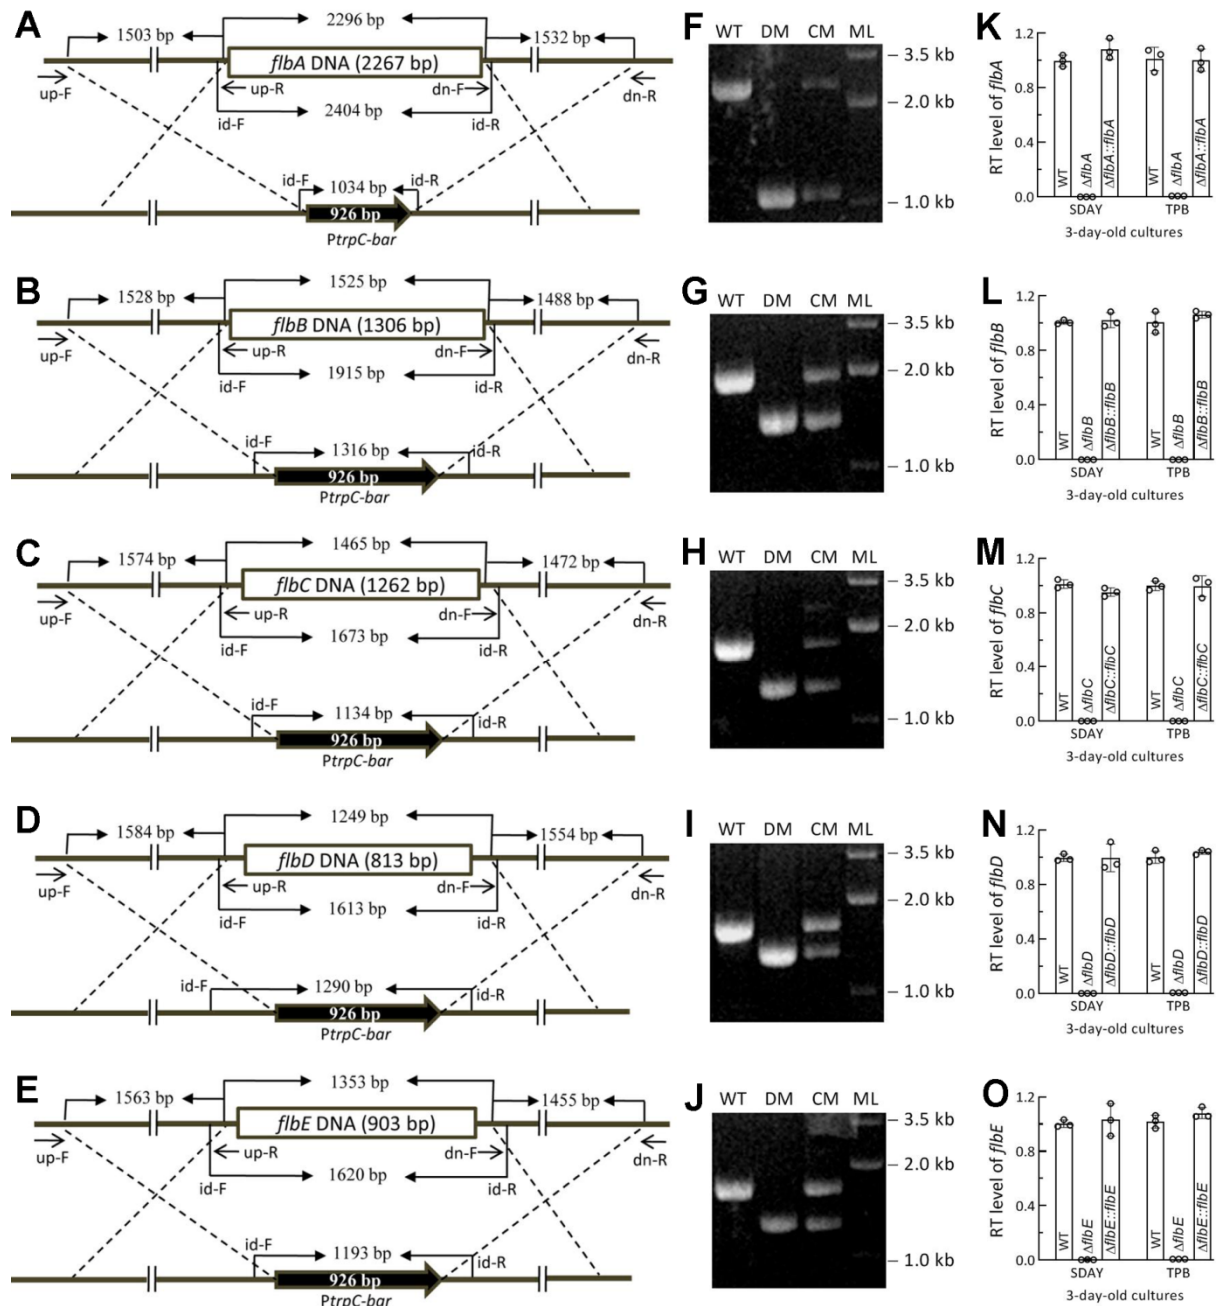

**Figure S1.** Generation and identification of *flbA*–*flbE* mutants in *B. bassiana*. (A–E) Diagrams for single-gene deletion strategies of *flbA*–*flbE*. (F–J) The *flbA*, *flbB*, *flbC*, *flbD* and *flbE* mutants identified via PCR analysis with paired primers (see Table S1), respectively. Indicated by the detected DNA fragments, the full-length coding and partial flanking regions of each target gene were successfully deleted from the WT strain as expected ( $2404 + 926 - 1034 = 2296$  bp for *flbA*,  $1915 + 926 - 1316 = 1525$  bp for *flbB*,  $1915 + 926 - 1316 = 1525$  bp for *flbC*,  $1613 + 926 - 1290 = 1249$  bp for *flbD*, and  $1620 + 926 - 1193 = 1353$  bp for *flbE*). DM, deletion mutant. CM, complementation mutant. ML, molecular ladder of genomic DNA. (K–O) Relative transcript (RT) levels of *flbA*, *flbB*, *flbC*, *flbD* and *flbE* in the 3-d-old SDAY and TPB cultures of their deletion and complementation mutants with respect to the WT standard. Note that the expression of *each flb gene* was not detectable in DM but well restored by targeted gene complementation. Error bars: standard deviations of the means from three cDNA samples derived from independent cultures of each strain.

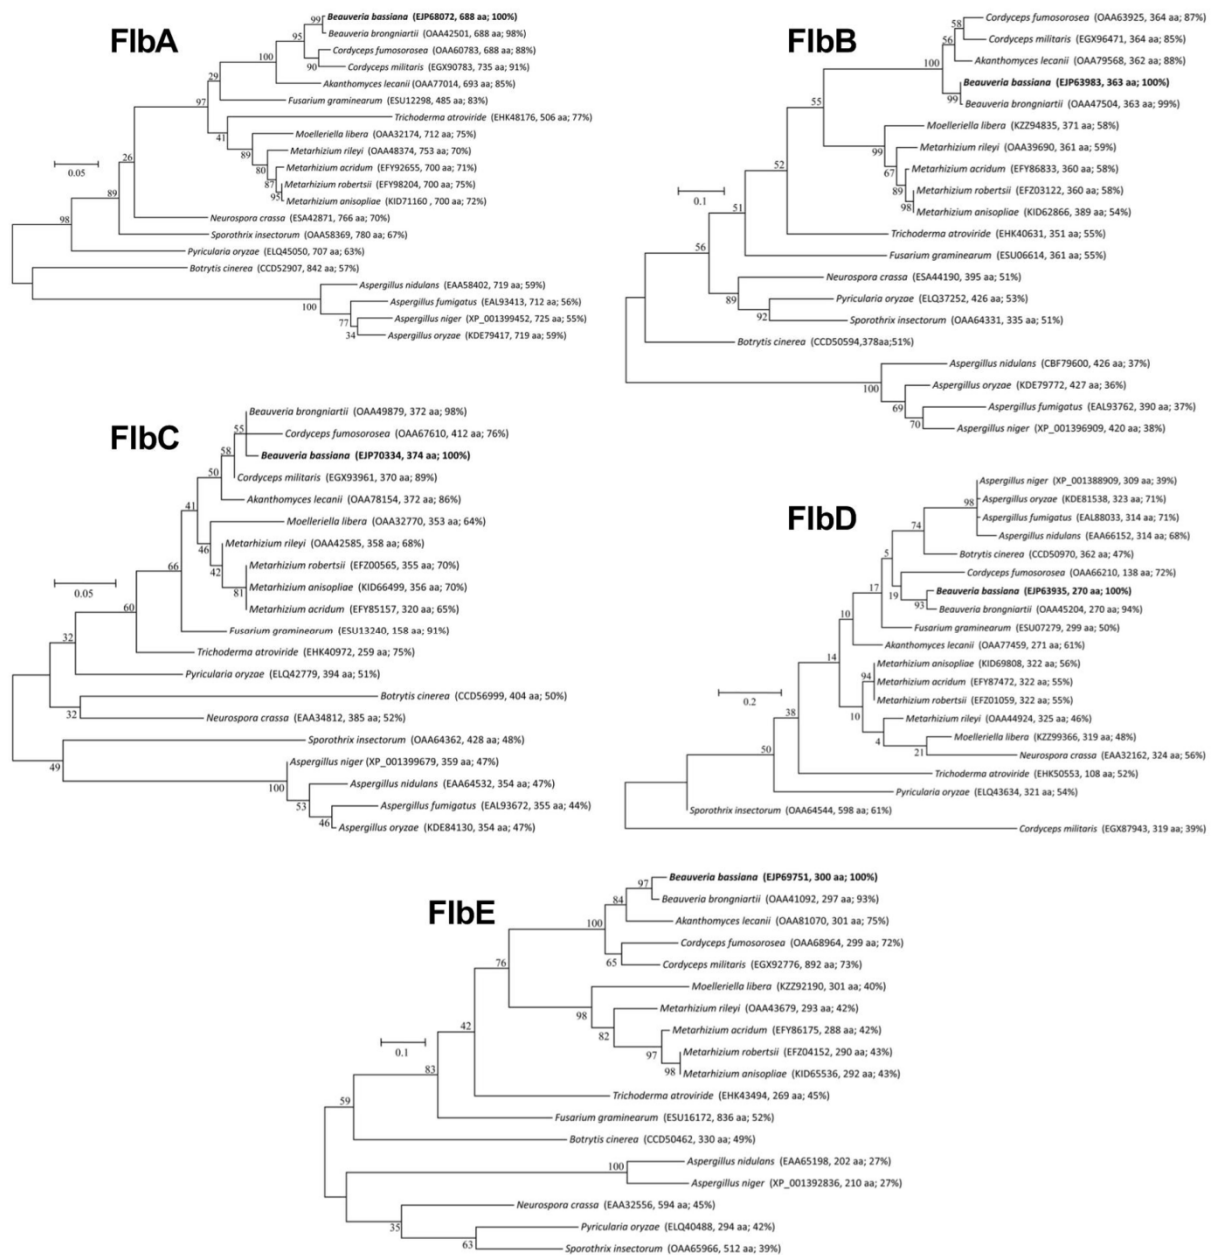

**Figure S2.** Phylogenetic trees of FlbA–FlbE orthologues found in selected filamentous fungi. Each tree was constructed with the maximum likelihood method in MEGA7 at <http://www.megasoftware.net/> (accessed on 23 March 2022). Bootstrap values of 1000 replications are shown at nodes. Scale: branch length proportional to genetic distance. The NCBI accession code of each protein, the length of its amino acid sequence, and its protein sequence identity to its orthologue (in bold) in *B. bassiana* are given in the parentheses following the fungal name.

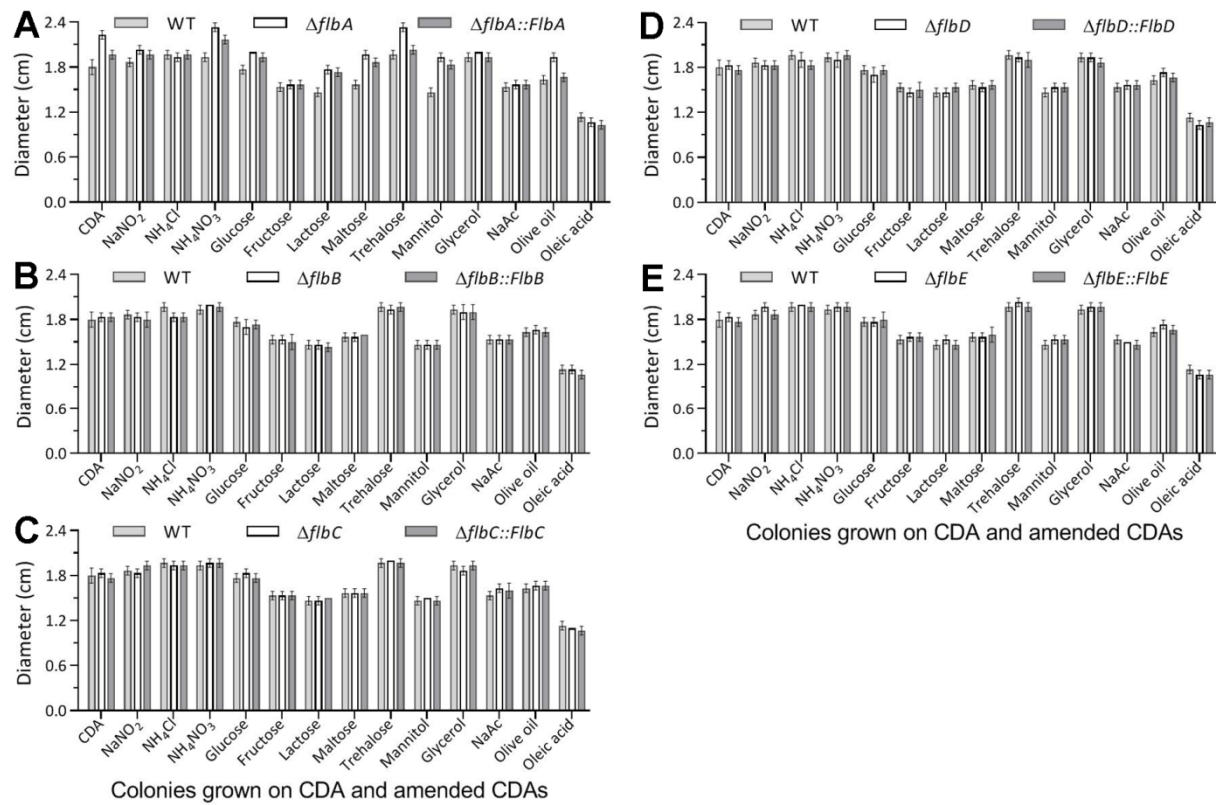

**Figure S3.** The diameters of fungal colonies grown at the optimal regime of 25°C and L:D 12:12 for 7 d on the plates of minimal CDA and CDAs amended with different carbon or nitrogen sources. Each colony was initiated by spotting 1  $\mu$ L of a 10<sup>6</sup> conidia/mL suspension. Error bars: standard deviations of the means from three independent replicates.



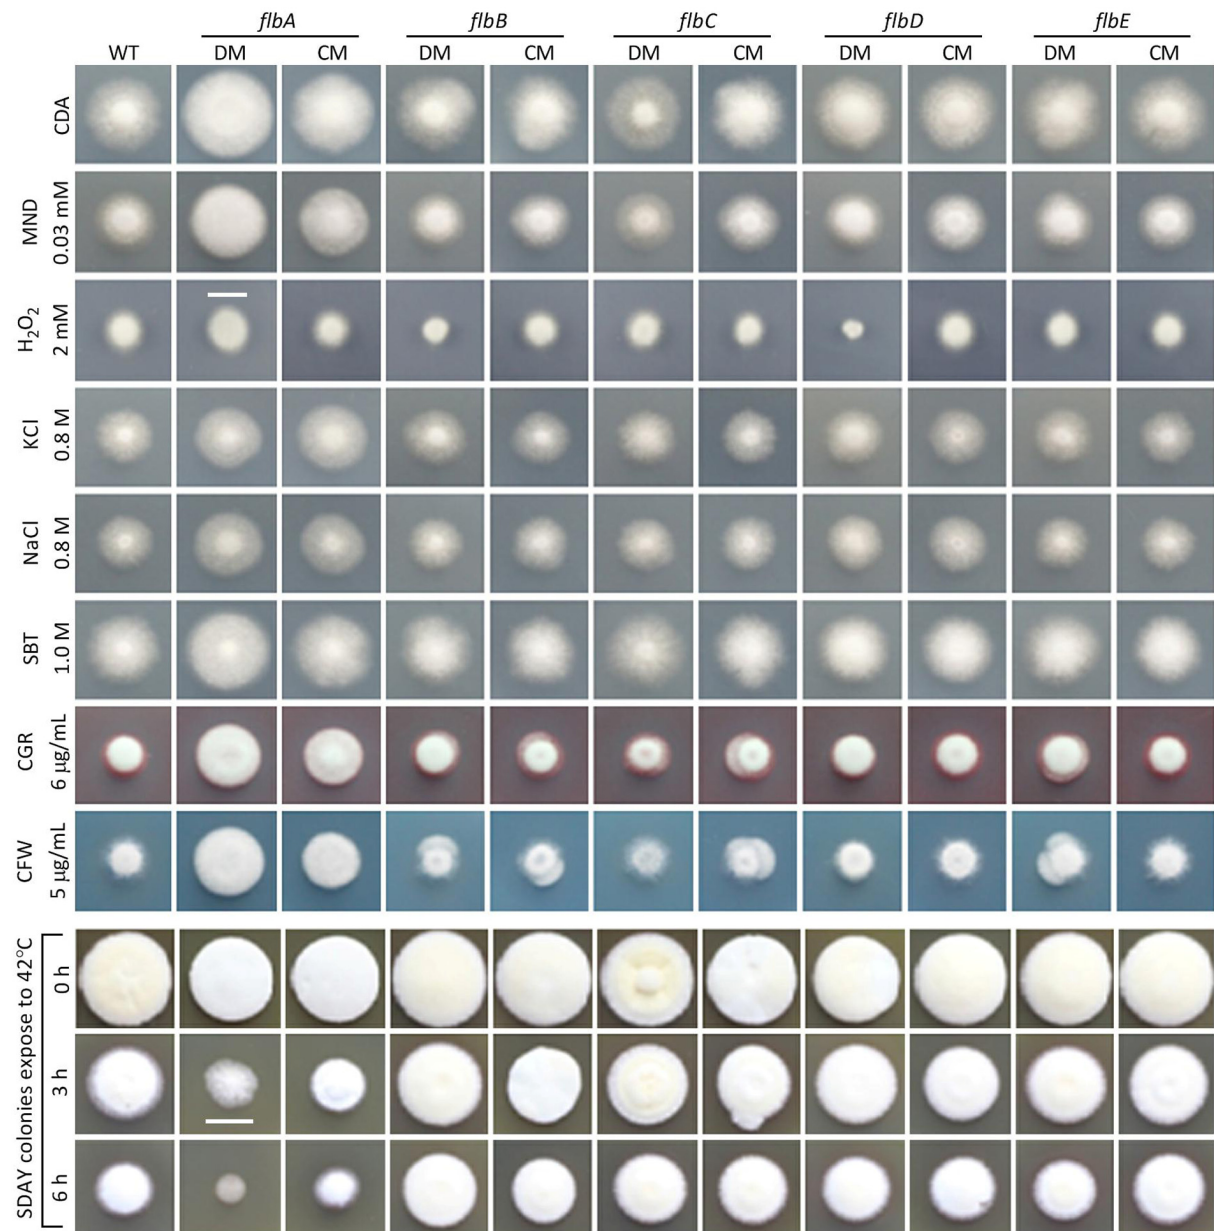

**Figure S4.** Images (scale: 10 mm) of fungal colonies incubated at 25°C for 7 d on the plates of CDA alone (control) or supplemented with the indicated concentrations of menadione (MND), H<sub>2</sub>O<sub>2</sub>, KCl, NaCl, sorbitol (SBT), Congo red (CGR) and calcofluor white, respectively, and of SDAY colonies incubated at 25°C for 5-d growth recovery after 2 d-old colonies were exposed to a 42°C heat shock for 3 and 6 h. Each colony was initiated by spotting 1 µL of a 10<sup>6</sup> conidia/mL suspension.
